# Supplementary material for: A longitudinal follow-up of COVID-19 patients in the convalescent phase showed recovery in radiological results, the dynamics of lymphocytes, and a decrease in the level of IgG antibody: a single-centre, observational study
Source: PubMed Central journal article supplement — J Thorac Dis. 2021 May;13(5):2986–3000. doi: 10.21037/jtd-20-3011 (PMC8182512; doi:10.21037/jtd-20-3011), 2021-05
Supplement: jtd-13-05-2986-supplementary.pdf [file jtd-13-05-2986-supplementary.pdf]

## Supplementary

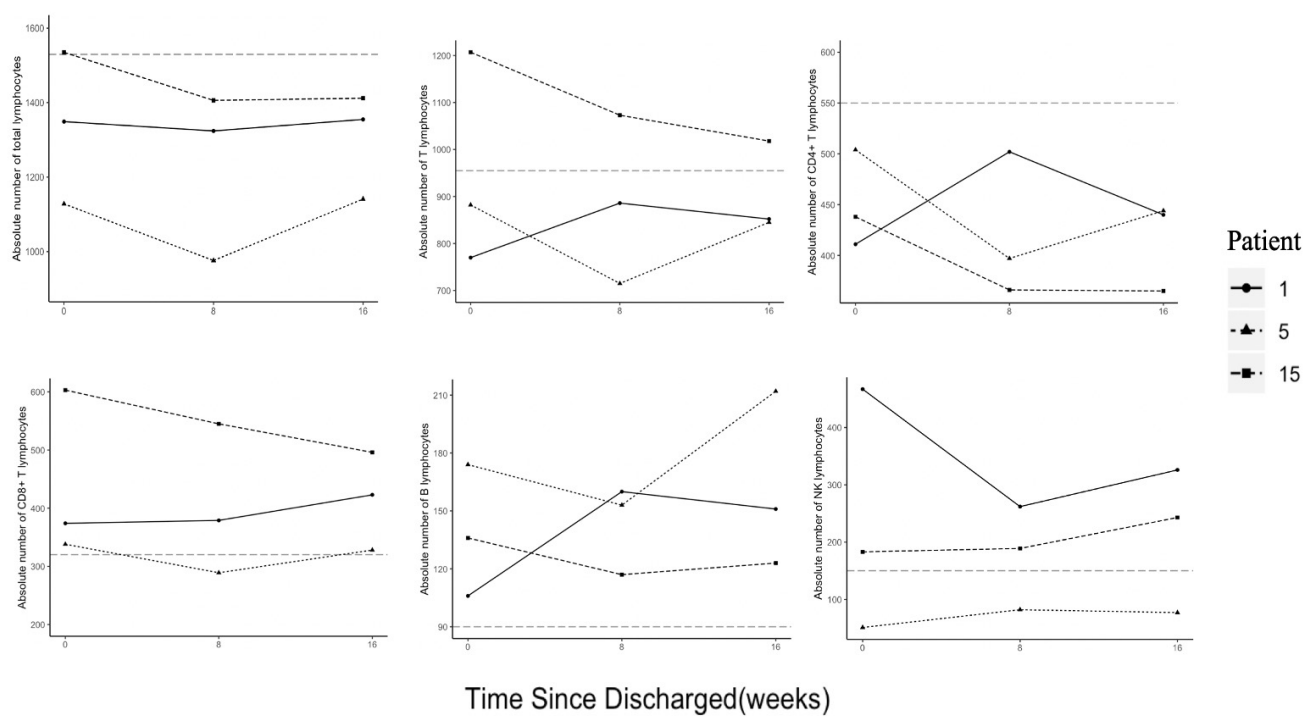

**Figure S1** Dynamics of lymphocyte subpopulations in 3 patients who experienced progressive lymphopenia after discharge. The gray dotted line indicates the lower values of the normal reference interval.

**Table S1** Number and fraction of patients with a decreased level of lymphocyte subpopulation

| Lymphocyte subpopulation | Weeks after discharge | Decreased Compared to Normal Lower Value (n/total, %) |                  | P-value <sup>#</sup> | Moderate (n = 9) | Severe/Critical (n = 6) | P-value <sup>#</sup> |
|--------------------------|-----------------------|-------------------------------------------------------|------------------|----------------------|------------------|-------------------------|----------------------|
|                          |                       | ≤ 45 y/o (n = 8)                                      | > 45 y/o (n = 7) |                      |                  |                         |                      |
| Total Lymphocytes        | 0                     | 6, 75.0%                                              | 6, 85.7%         | 1.000                | 7, 77.6%         | 5, 83.3%                | 1.000                |
|                          | 8                     | 5, 62.5%                                              | 4, 57.1%         | 1.000                | 5, 55.6%         | 4, 66.7%                | 1.000                |
|                          | 16                    | 4, 50.0%                                              | 3, 42.9%         | 1.000                | 4, 44.4%         | 3, 50.0%                | 1.000                |
| Total T cell             | 0                     | 5, 62.5%                                              | 5, 57.1%         | 1.000                | 5, 55.6%         | 5, 83.3%                | 0.580                |
|                          | 8                     | 5, 62.5%                                              | 5, 57.1%         | 1.000                | 5, 33.3%         | 5, 50.0%                | 0.580                |
|                          | 16                    | 3, 37.5%                                              | 3, 42.9%         | 1.000                | 3, 33.3%         | 3, 50.0%                | 0.622                |
| CD4+ T cell              | 0                     | 6, 75.0%                                              | 4, 57.1%         | 0.608                | 6, 66.7%         | 4, 66.7%                | 1.000                |
|                          | 8                     | 6, 75.0%                                              | 3, 42.9%         | 0.315                | 5, 55.6%         | 4, 66.7%                | 1.000                |
|                          | 16                    | 4, 50.0%                                              | 3, 42.9%         | 1.000                | 4, 44.4%         | 3, 50.0%                | 1.000                |
| CD8+ T cell              | 0                     | 2, 25.0%                                              | 3, 42.9%         | 1.000                | 1, 11.1%         | 4, 66.7%                | 0.089                |
|                          | 8                     | 2, 25.0%                                              | 2, 28.6%         | 1.000                | 1, 11.1%         | 3, 50.0%                | 0.235                |
|                          | 16                    | 0, 0                                                  | 1, 14.3%         | 0.467                | 0, 0             | 1, 16.7%                | 0.400                |
| B cell                   | 0                     | 2, 25.0%                                              | 1, 14.3%         | 1.000                | 2, 22.2%         | 1, 16.7%                | 1.000                |
|                          | 8                     | 0, 0                                                  | 1, 14.3%         | 0.467                | 0, 0             | 1, 16.7%                | 0.400                |
|                          | 16                    | 0, 0                                                  | 0, 0             | -                    | 0, 0             | 0, 0                    | -                    |
| NK cell                  | 0                     | 4, 50.0%                                              | 4, 57.1%         | 1.000                | 4, 44.4%         | 4, 66.7%                | 0.608                |
|                          | 8                     | 2, 25.0%                                              | 2, 28.6%         | 1.000                | 3, 33.3%         | 1, 16.7%                | 0.604                |
|                          | 16                    | 1, 12.5%                                              | 0, 0             | 1.000                | 1, 11.1%         | 0, 0                    | 1.000                |

<sup>#</sup> 2-tailed P-value by Fisher's exact test.

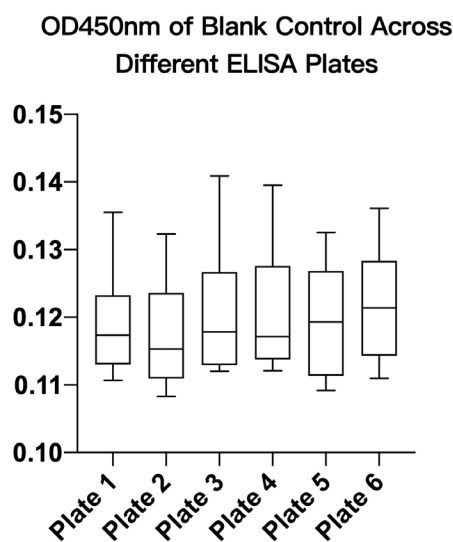

**Figure S2** Mean OD450 nm value of blank controls between different ELISA plates.
